# Supplementary material
Source: PubMed Central journal article supplement (PMC4578871)
Supplement: NIHMS721860-supplement-Supp_1.pdf [file NIHMS721860-supplement-Supp_1.pdf]

Whole exome sequencing in extended families with autism spectrum disorder implicates four candidate genes

Human Genetics

Nicola H. Chapman, Alejandro Q. Nato Jr., Raphael Bernier, Katy Ankenman, Harkirat Sohi, Jeff Munson, Ashok Patowary, Marilyn Archer, Elizabeth M. Blue, Sara Jane Webb, Hilary Coon, Wendy H. Raskind, Zoran Brkanac, Ellen M. Wijsman

N.H. Chapman, A.Q. Nato Jr, H. Sohi, E.M. Blue, W.H. Raskind, E.M. Wijsman

Division of Medical Genetics, School of Medicine, University of Washington, Seattle, WA

R. Bernier, J. Munson, A. Patowary, M. Archer, S.J. Webb, W.H. Raskind, Z. Brkanac

Department of Psychiatry and Behavioral Sciences, University of Washington, Seattle, WA

K. Ankenman

Department of Psychiatry, University of California, San Francisco, CA

J. Munson, S.J. Webb

Center on Child Development and Disability, University of Washington, Seattle, WA

H. Coon

Department of Internal Medicine, University of Utah, Salt Lake City, UT

H. Coon

Department of Psychiatry, School of Medicine, University of Utah, Salt Lake City, UT

E. M. Wijsman

Department of Biostatistics, University of Washington, Seattle, WA

W.H. Raskind, E.M. Wijsman

Department of Genome Sciences, University of Washington, Seattle, WA

Corresponding Author:

Ellen M. Wijsman

[wijisman@u.washington.edu](mailto:wijisman@u.washington.edu)

telephone: (206) 543-8987

fax: (206) 616-1973

Online Resource 1: selected phenotype data for affected individuals. ASD=Autism Spectrum Disorder, BAP=Broader Autism Phenotype. Age at time of IQ testing is shown only if it is different from the age at which ADOS was administered. IQ scores are for age-appropriate Wechsler tests unless otherwise noted (†=Mullen).

| Family | ID     | dx  | Sex | Age yrs(mo) | Version | Module | ADOS scores   |                          |       | Severity Score | IQ scores   |     |     |
|--------|--------|-----|-----|-------------|---------|--------|---------------|--------------------------|-------|----------------|-------------|-----|-----|
|        |        |     |     |             |         |        | Social affect | Rest. and rep. behaviors | Total |                | Age yrs(mo) | Piq | viq |
| AU119  | 2043   | ASD | M   | 11(1)       | WPS     | 3      | 6             | 1                        | 7     | 4              |             | 120 | 97  |
| AU119  | 2039   | ASD | M   | 9(7)        | WPS     | 3      | 10            | 1                        | 11    | 7              |             | 133 | 128 |
| AU119  | 2037   | ASD | F   | 3(1)        | G       | 1      | 9             | 3                        | 12    | 6              | 15(3)       | 89  | 94  |
| AU119  | 2036   | ASD | M   | 6(2)        | G       | 3      | 7             | 0                        | 7     | 4              |             | 66  | 134 |
| AU119  | 2033   | ASD | F   | 18(1)       | WPS     | 4      | 7             | 0                        | 7     | 4              |             | 97  | 87  |
| AU119  | 2031   | ASD | M   | 11(4)       | G       | 3      | 10            | 3                        | 13    | 8              |             | 117 | 100 |
| AU119  | 2030   | ASD | M   | 13(1)       | G       | 4      | 10            | 4                        | 14    | 8              |             | 97  | 108 |
| AU119  | 2029   | ASD | F   | 14(7)       | G       | 4      | 19            | 3                        | 22    | 10             |             | 128 | 106 |
| AU119  | 2026   | ASD | M   | 9(0)        | G       | 3      | 12            | 3                        | 15    | 9              |             | 114 | 128 |
| AU119  | 2027   | ASD | M   | 8(10)       | G       | 3      | 18            | 3                        | 21    | 10             | 8(8)        | 125 | 128 |
| AU119  | 2048   | ASD | M   | 4(1)        | WPS     | 2      | 5             | 3                        | 8     | 5              |             | 126 | 75  |
| AU625  | 16028  | ASD | M   | 9(2)        | WPS     | 3      | 4             | 2                        | 6     | 3              |             | 100 | 136 |
| AU625  | 16030  | ASD | M   | 3(11)       | WPS     | 2      | 10            | 1                        | 11    | 6              |             | -   | -   |
| AU625  | 16023  | ASD | M   | 5(2)        | G       | 2      | 19            | 6                        | 25    | 10             | 11(0)       | 78  | 53  |
| AU366  | 27012  | ASD | F   | 4(9)        | WPS     | 3      | 5             | 2                        | 7     | 4              |             | 114 | 72  |
| AU366  | 27013  | ASD | F   | 6(3)        | G       | 3      | 1             | 1                        | 2     | 1              |             | 106 | 75  |
| AU366  | 27014  | ASD | M   | 3(8)        | G       | 2      | 4             | 1                        | 5     | 2              |             | 67† | 64† |
| AU071  | 1003   | ASD | M   | 11(9)       | G       | 3      | 8             | 2                        | 10    | 6              |             | 67  | 97  |
| AU071  | 1004   | ASD | M   | 10(6)       | G       | 3      | 10            | 2                        | 12    | 7              |             | 78  | 103 |
| AU071  | 1005   | BAP | M   | 7(2)        | G       | 3      | 1             | 1                        | 2     | 1              |             | 122 | 103 |
| AU071  | 1013   | ASD | F   | 12(5)       | WPS     | 3      | 6             | 1                        | 7     | 4              |             | 89  | 106 |
| AU754  | 24017* | BAP | F   |             |         |        |               |                          |       |                |             | 64† | 75† |
| AU754  | 24016  | ASD | F   | 6(5)        | WPS     | 1      | 17            | 3                        | 20    | 8              |             | 80  | 50  |
| AU754  | 24015  | ASD | F   | 7(9)        | WPS     | 3      | 10            | 1                        | 11    | 7              |             | 103 | 70  |

|       |       |     |   |        |     |   |    |   |    |    |       |     |     |
|-------|-------|-----|---|--------|-----|---|----|---|----|----|-------|-----|-----|
| AU754 | 24011 | BAP | M | 19(5)  | WPS | 4 | 1  | 3 | 4  | 2  |       | 145 | 135 |
| AU754 | 24009 | BAP | M | 7(10)  | WPS | 3 | 3  | 0 | 3  | 2  |       | 97  | 94  |
| AU599 | 6003  | ASD | M | 9(3)   | WPS | 3 | 7  | 2 | 9  | 6  |       | 103 | 114 |
| AU599 | 6004  | ASD | M | 5(4)   | WPS | 2 | 6  | 1 | 7  | 3  |       | 103 | 69  |
| AU599 | 6015  | ASD | M | 18(6)  | WPS | 4 | 11 | 1 | 12 | 7  |       | 89  | 92  |
| AU599 | 6014  | ASD | M | 20(5)  | WPS | 4 | 9  | 1 | 10 | 6  |       | 111 | 95  |
| AU113 | 26013 | ASD | M | 32(11) | WPS | 4 | 13 | 3 | 16 | 9  |       | 80  | 76  |
| AU113 | 26011 | ASD | M | 11(5)  | G   | 2 | 14 | 4 | 18 | 8  |       | 92  | 50  |
| AU113 | 26010 | ASD | M | 14(2)  | G   | 4 | 11 | 1 | 12 | 7  | 14(7) | 120 | 111 |
| AU640 | 21013 | ASD | F | 16(8)  | WPS | 3 | 11 | 4 | 15 | 9  |       | 100 | 106 |
| AU640 | 21015 | ASD | M | 12(7)  | WPS | 3 | 17 | 5 | 22 | 10 |       | 117 | 81  |
| AU640 | 21014 | ASD | M | 15(8)  | WPS | 3 | 6  | 4 | 10 | 6  |       | 89  | 89  |
| AU136 | 18006 | ASD | M | 11(2)  | G   | 3 | 7  | 1 | 8  | 5  |       | 69  | 78  |
| AU136 | 18007 | ASD | F | 6(8)   | G   | 2 | 12 | 1 | 13 | 6  |       | 108 | 50  |
| AU136 | 18008 | ASD | F | 4(1)   | G   | 1 | 16 | 1 | 17 | 6  |       | 58† | 27† |
| AU136 | 18003 | ASD | M | 40(10) | WPS | 2 | 12 | 5 | 17 | ** |       | 55  | 55  |
| AU053 | 25011 | ASD | M | 16(4)  | G   | 3 | 5  | 1 | 6  | 3  |       | 83  | 59  |
| AU053 | 25013 | ASD | M | 11(9)  | G   | 2 | 14 | 3 | 17 | 7  |       | 97  | 50  |
| AU053 | 25014 | ASD | M | 39(5)  | WPS | 4 | 5  | 1 | 6  | 3  |       | 108 | 89  |

\*ADOS scores were unavailable on this individual. Diagnosis was based on ADI-R and professional judgment.

\*\* The severity score could not be computed for AU136-18003, because this subject is older than the maximum age for this score.
