# Supplementary material
Source: PubMed Central journal article supplement (PMC4578871)

Whole exome sequencing in extended families with autism spectrum disorder implicates four candidate genes

Nicola H. Chapman, Alejandro Q. Nato Jr., Raphael Bernier, Katy Ankenman, Harkirat Sohi, Jeff Munson, Ashok Patowary, Marilyn Archer, Elizabeth M. Blue, Sara Jane Webb, Hilary Coon, Wendy H. Raskind, Zoran Brkanac, Ellen M. Wijsman

N.H. Chapman, A.Q. Nato Jr, H. Sohi, E.M. Blue, W.H. Raskind, E.M. Wijsman  
Division of Medical Genetics, School of Medicine, University of Washington, Seattle, WA

R. Bernier, J. Munson, A. Patowary, M. Archer, S.J. Webb, W.H. Raskind, Z. Brkanac  
Department of Psychiatry and Behavioral Sciences, University of Washington, Seattle, WA

K. Ankenman  
Department of Psychiatry, University of California, San Francisco, CA

J. Munson, S.J. Webb  
Center on Child Development and Disability, University of Washington, Seattle, WA

H. Coon  
Department of Internal Medicine, University of Utah, Salt Lake City, UT

H. Coon  
Department of Psychiatry, School of Medicine, University of Utah, Salt Lake City, UT

E. M. Wijsman  
Department of Biostatistics, University of Washington, Seattle, WA

W.H. Raskind, E.M. Wijsman  
Department of Genome Sciences, University of Washington, Seattle, WA

Corresponding Author:  
Ellen M. Wijsman  
[wijman@u.washington.edu](mailto:wijman@u.washington.edu)  
telephone: (206) 543-8987  
fax: (206) 616-1973

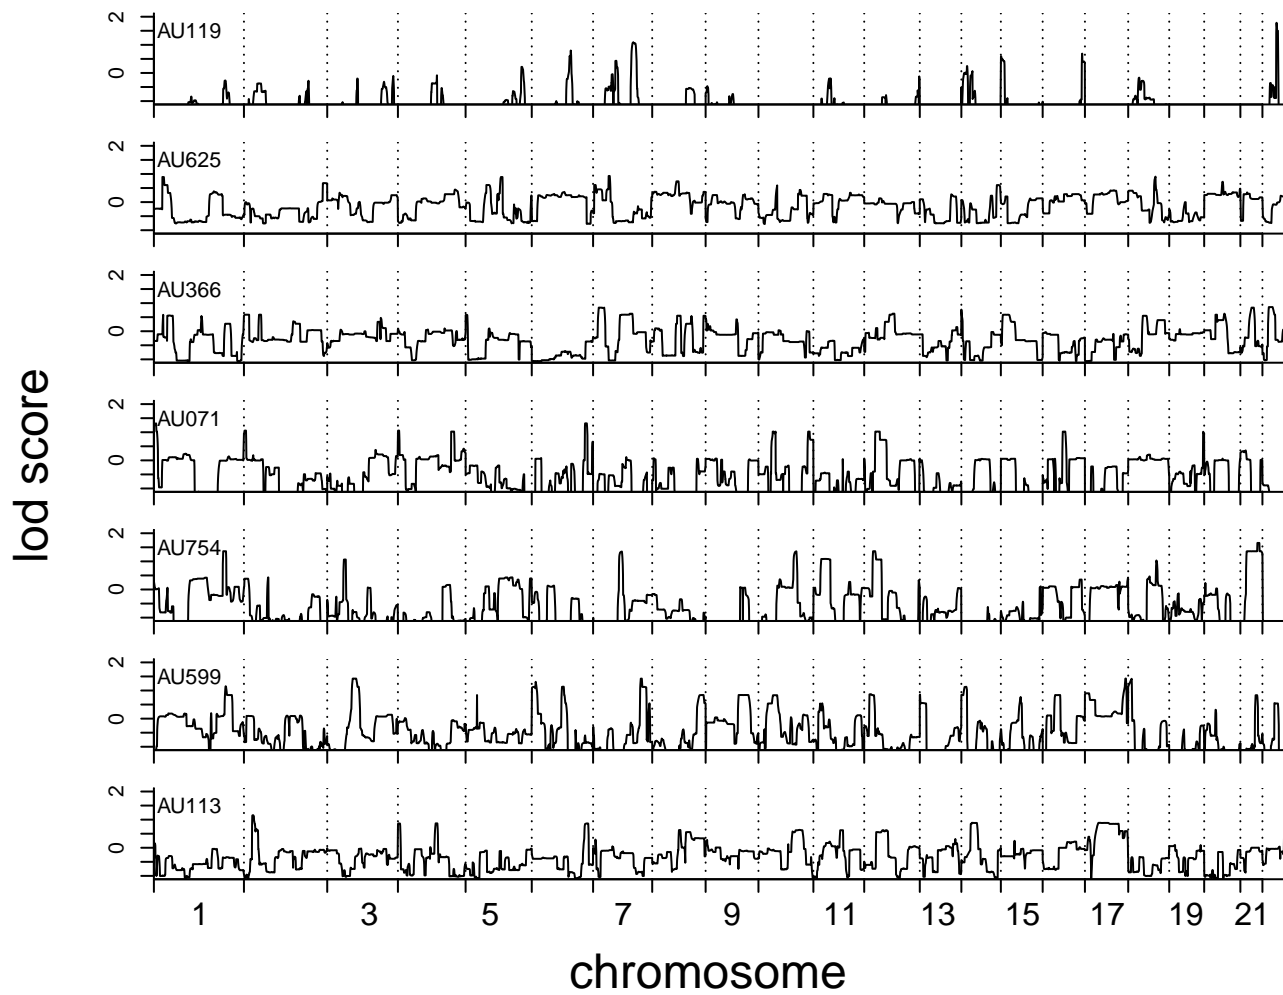

Supplement: NIHMS721860-supplement-Supp_2.pdf [file NIHMS721860-supplement-Supp_2.pdf]
