# Supplementary material
Source: PubMed Central journal article supplement (PMC4578871)
Supplement: NIHMS721860-supplement-Supp_3.pdf [file NIHMS721860-supplement-Supp_3.pdf]

Whole exome sequencing in extended families with autism spectrum disorder implicates four candidate genes

Human Genetics

Nicola H. Chapman, Alejandro Q. Nato Jr., Raphael Bernier, Katy Ankenman, Harkirat Sohi, Jeff Munson, Ashok Patowary, Marilyn Archer, Elizabeth M. Blue, Sara Jane Webb, Hilary Coon, Wendy H. Raskind, Zoran Brkanac, Ellen M. Wijsman

N.H. Chapman, A.Q. Nato Jr, H. Sohi, E.M. Blue, W.H. Raskind, E.M. Wijsman

Division of Medical Genetics, School of Medicine, University of Washington, Seattle, WA

R. Bernier, J. Munson, A. Patowary, M. Archer, S.J. Webb, W.H. Raskind, Z. Brkanac

Department of Psychiatry and Behavioral Sciences, University of Washington, Seattle, WA

K. Ankenman

Department of Psychiatry, University of California, San Francisco, CA

J. Munson, S.J. Webb

Center on Child Development and Disability, University of Washington, Seattle, WA

H. Coon

Department of Internal Medicine, University of Utah, Salt Lake City, UT

H. Coon

Department of Psychiatry, School of Medicine, University of Utah, Salt Lake City, UT

E. M. Wijsman

Department of Biostatistics, University of Washington, Seattle, WA

W.H. Raskind, E.M. Wijsman

Department of Genome Sciences, University of Washington, Seattle, WA

Corresponding Author:

Ellen M. Wijsman

[wijisman@u.washington.edu](mailto:wijisman@u.washington.edu)

telephone: (206) 543-8987

fax: (206) 616-1973

Online Resource 3: Variants with association test p-value less than or equal to 0.05, or Mendelian inheritance pattern, by family.

Table OR3a: AU119 variants with a segregation pattern consistent with Mendelian inheritance or association  $p \leq 0.05$ . Bold indicates variants with  $p \leq 0.05$ . Pattern denotes whether the variant was present in a pattern consistent with Mendelian inheritance, based on WES only.

| chr | position           | rsname     | ref | alt | pattern | p-value      | Mean dosage |             | 1KGP        | dbSNP     | Predicted function |          | Gene          |
|-----|--------------------|------------|-----|-----|---------|--------------|-------------|-------------|-------------|-----------|--------------------|----------|---------------|
|     |                    |            |     |     |         |              | affected    | unaffected  |             |           | GVS                | DBSNP    |               |
| 7   | <b>121,944,239</b> | .          | T   | C   | yes     | <b>0.007</b> | <b>0.87</b> | <b>0.44</b> | 0           | dbSNP_134 | synonymous         | missense | <b>FEZF1</b>  |
| 22  | <b>38,071,707</b>  | rs75882122 | A   | G   | no      | <b>0.025</b> | <b>0.49</b> | <b>0.14</b> | <b>0.05</b> | dbSNP_52  | utr-5              | utr--5   | <b>LGALS1</b> |

Table OR3b: AU625 variants with a segregation pattern consistent with Mendelian inheritance or association  $p \leq 0.05$ . Bold indicates variants with  $p \leq 0.05$ . Pattern denotes whether the variant was present in a pattern consistent with Mendelian inheritance, based on WES only. \* indicates genes known to have a high rate of false positives in exome sequencing as indicated by Fajardo et al 2011 (Detecting false positive signals in exome sequencing, Human Mutation 33(4):609-613).

| chr | position           | rsname            | ref | alt | pattern | p-value     | Mean dosage |             | 1KGP        | dbSNP            | Predicted function |                 | Gene           |
|-----|--------------------|-------------------|-----|-----|---------|-------------|-------------|-------------|-------------|------------------|--------------------|-----------------|----------------|
|     |                    |                   |     |     |         |             | affected    | unaffected  |             |                  | GVS                | DBSNP           |                |
| 1   | 22,165,963         | rs139500146       | T   | C   | yes     | 0.12        | 1.00        | 0.35        | 0.02        | dbSNP_134        | missense           | missense        | <i>HSPG2*</i>  |
| 1   | 22,181,360         | rs116788687       | G   | C   | yes     | 0.12        | 1.00        | 0.36        | 0.02        | dbSNP_132        | missense           | missense        | <i>HSPG2*</i>  |
| 5   | <b>102,490,411</b> | <b>rs35671301</b> | T   | G   | yes     | <b>0.00</b> | <b>1.00</b> | <b>0.02</b> | <b>0.01</b> | <b>dbSNP_126</b> | <b>missense</b>    | <b>missense</b> | <b>HISPPD1</b> |

Table OR3c: AU366 variants with a segregation pattern consistent with Mendelian inheritance or association  $p \leq 0.05$ . Bold indicates variants with  $p \leq 0.05$ . Pattern denotes whether the variant was present in a pattern consistent with Mendelian inheritance, based on WES only.

| chr | position          | rsname          | ref | alt | pattern | p-value     | Mean dosage |             |             | dbSNP           | Predicted function |                 | Gene                    |
|-----|-------------------|-----------------|-----|-----|---------|-------------|-------------|-------------|-------------|-----------------|--------------------|-----------------|-------------------------|
|     |                   |                 |     |     |         |             | Affected    | unaffected  | 1KGP freq   |                 | GVS                | DBSNP           |                         |
| 7   | 23,306,141        | rs75801644      | G   | A   | yes     | 0.47        | 1.00        | 0.57        | 0.03        | dbSNP_131       | missense           | missense        | <i>GPNM</i><br><i>B</i> |
| 22  | <b>26,688,831</b> | <b>rs137203</b> | G   | T   | yes     | <b>0.00</b> | <b>1.00</b> | <b>0.01</b> | <b>0.01</b> | <b>dbSNP_78</b> | <b>missense</b>    | <b>missense</b> | <b>SEZ6L</b>            |

Table OR3d: AU071 variants with a segregation pattern consistent with Mendelian inheritance or association  $p \leq 0.05$  Bold indicates variants with  $p \leq 0.05$ . Pattern denotes whether the variant was present in a pattern consistent with Mendelian inheritance, based on WES only. .\* indicates genes known to have a high rate of false positives in exome sequencing as indicated by Fajardo et al 2011 (Detecting false positive signals in exome sequencing, Human Mutation 33(4):609-613). \*\* this variant did not have a segregation pattern consistent with Mendelian inheritance due to missing genotypes in two affected individuals.

| chr      | position       | rsname             | ref          | alt      | pattern     | p-value     | Mean dosage |             |          | Predicted function |                 |                      | Gene            |
|----------|----------------|--------------------|--------------|----------|-------------|-------------|-------------|-------------|----------|--------------------|-----------------|----------------------|-----------------|
|          |                |                    |              |          |             |             | Affected    | unaffected  | 1KGP     | dbSNP              | GVS             | DBSNP                |                 |
| <b>1</b> | <b>877,523</b> | <b>rs200195897</b> | <b>C</b>     | <b>G</b> | <b>No**</b> | <b>0.01</b> | <b>0.82</b> | <b>0.04</b> | <b>0</b> | <b>dbSNP_137</b>   | <b>missense</b> | <b>missense</b>      | <b>SAMD11</b>   |
| 1        | 3,697,663      | rs11547615         | C            | T        | yes         | 0.12        | 1.00        | 0.34        | 0.03     | dbSNP_120          | missense        | missense             | LRRC47          |
| 1        | 3,755,638      | .                  | C            | T        | yes         | 0.12        | 1.00        | 0.34        | 0        | none               | missense        | unknown              | CEP104          |
| 4        | 663,916        | rs61760239         | C            | A        | yes         | 0.13        | 1.00        | 0.38        | 0.03     | dbSNP_129          | utr-3           | utr-3-prime          | PDE6B           |
| 4        | 166,388,900    | rs144727363        | C            | T        | yes         | 0.12        | 1.00        | 0.34        | 0        | dbSNP_134          | missense        | missense             | CPE             |
| 4        | 169,317,237    | rs202066594        | C            | G        | yes         | 0.12        | 1.00        | 0.34        | 0        | dbSNP_137          | missense        | missense             | DDX60L*         |
| 4        | 173,730,541    | rs144181630        | A            | G        | yes         | 0.12        | 1.00        | 0.34        | 0        | dbSNP_134          | missense        | missense             | GALNTL6         |
| 10       | 27,497,191     | rs7918793          | G            | A        | yes         | 0.13        | 1.00        | 0.45        | 0.05     | dbSNP_116          | missense        | missense             | ACBD5           |
| 12       | 16,342,622     | rs111967344        | G            | A        | yes         | 0.12        | 1.00        | 0.34        | 0.01     | dbSNP_132          | missense        | missense             | SLC15A5         |
| 12       | 18,865,819     | rs144902254        | A            | G        | yes         | 0.12        | 1.00        | 0.34        | 0        | dbSNP_134          | missense        | missense             | PLCZ1<br>SLCO1C |
| 12       | 20,876,168     | rs144285413        | C            | T        | yes         | 0.12        | 1.00        | 0.34        | 0.01     | dbSNP_134          | missense        | missense             | 1<br>SLCO1B     |
| 12       | 21,196,367     | .                  | T            | A        | yes         | 0.12        | 1.00        | 0.34        | 0        | none               | missense        | unknown              | 7<br>SLCO1B     |
| 12       | 21,196,466     | .                  | C            | A        | yes         | 0.12        | 1.00        | 0.34        | 0        | none               | missense        | unknown              | 7               |
| 12       | 27,648,704     | .                  | TAGATACGGAAG | T        | yes         | 0.38        | 1.00        | 0.68        | 0        | none               | frameshift      | unknown              | C12orf70        |
| 12       | 29,630,166     | rs189316643        | C            | T        | yes         | 0.38        | 1.00        | 0.67        | 0.003    | dbSNP_135          | splice-3        | splice-donor-variant | OVCH1           |
| 12       | 40,740,686     | rs33995883         | A            | G        | yes         | 0.39        | 1.00        | 0.69        | 0.02     | dbSNP_126          | missense        | missense             | LRRK2           |
| 12       | 49,168,798     | rs3730071          | C            | A        | yes         | 0.39        | 1.00        | 0.69        | 0.02     | dbSNP_107          | missense        | missense             | ADCY6           |
| 12       | 52,579,331     | rs140694010        | C            | T        | yes         | 0.38        | 1.00        | 0.69        | 0        | dbSNP_134          | missense        | missense             | KRT80           |
| 19       | 57,184,265     | rs200338534        | T            | G        | yes         | 0.12        | 1.00        | 0.37        | 0        | dbSNP_137          | near-gene-5     | unknown              | none            |

Table OR3e: AU754 variants with a segregation pattern consistent with Mendelian inheritance or association  $p \leq 0.05$ . Bold indicates variants with  $p \leq 0.05$ . Pattern denotes whether the variant was present in a pattern consistent with Mendelian inheritance, based on WES only. . \* indicates genes known to have a high rate of false positives in exome sequencing as indicated by Fajardo et al 2011 (Detecting false positive signals in exome sequencing, Human Mutation 33(4):609-613) \*\* this variant did not have a Mendelian segregation pattern because the genotype was missing in one of the WES individuals.

| chr       | pos                | rsname             | ref      | alt      | pattern     | p-value     | Mean dosage |             |              | Predicted function |                 |                            | Gene            |
|-----------|--------------------|--------------------|----------|----------|-------------|-------------|-------------|-------------|--------------|--------------------|-----------------|----------------------------|-----------------|
|           |                    |                    |          |          |             |             | affected    | unaffected  | 1KGP         | dbSNP              | GVS             | DBSNP                      |                 |
| <b>1</b>  | <b>214,816,297</b> | <b>rs3795514</b>   | <b>A</b> | <b>G</b> | <b>yes</b>  | <b>0.03</b> | <b>1.00</b> | <b>0.35</b> | <b>0.04</b>  | <b>dbSNP_107</b>   | <b>missense</b> | <b>missense</b>            | <b>CENPF*</b>   |
| <b>1</b>  | <b>216,062,273</b> | <b>rs189748047</b> | <b>C</b> | <b>T</b> | <b>yes</b>  | <b>0.03</b> | <b>1.00</b> | <b>0.34</b> | <b>0</b>     | <b>dbSNP_135</b>   | <b>missense</b> | <b>missense</b>            | <b>USH2A*</b>   |
| <b>7</b>  | <b>72,992,858</b>  | <b>rs76029572</b>  | <b>C</b> | <b>G</b> | <b>No**</b> | <b>0.04</b> | <b>0.97</b> | <b>0.35</b> | <b>0.04</b>  | <b>dbSNP_131</b>   | <b>missense</b> | <b>missense</b>            | <b>TBL2</b>     |
| <b>10</b> | <b>98,031,160</b>  | <b>rs7916154</b>   | <b>T</b> | <b>C</b> | <b>yes</b>  | <b>0.03</b> | <b>1.00</b> | <b>0.33</b> | <b>0.01</b>  | <b>dbSNP_116</b>   | <b>utr-5</b>    | <b>utr-variant-5-prime</b> | <b>BLNK</b>     |
| <b>10</b> | <b>98,155,678</b>  | <b>rs41291628</b>  | <b>G</b> | <b>A</b> | <b>yes</b>  | <b>0.03</b> | <b>1.00</b> | <b>0.34</b> | <b>0.02</b>  | <b>dbSNP_127</b>   | <b>missense</b> | <b>missense</b>            | <b>TLL2</b>     |
| <b>10</b> | <b>98,742,043</b>  | <b>rs112594620</b> | <b>A</b> | <b>G</b> | <b>yes</b>  | <b>0.03</b> | <b>1.00</b> | <b>0.33</b> | <b>0.02</b>  | <b>dbSNP_132</b>   | <b>missense</b> | <b>missense</b>            | <b>C10orf12</b> |
| <b>10</b> | <b>102,089,635</b> | <b>rs117403721</b> | <b>C</b> | <b>A</b> | <b>yes</b>  | <b>0.03</b> | <b>1.00</b> | <b>0.33</b> | <b>0.01</b>  | <b>dbSNP_132</b>   | <b>missense</b> | <b>missense</b>            | <b>PKD2L1</b>   |
| 11        | 18,740,269         | rs201466035        | G        | A        | yes         | 0.23        | 1.00        | 0.67        | 0            | dbSNP_137          | missense        | missense                   | IGSF22          |
| 12        | 21,695,439         | rs61733199         | T        | C        | yes         | 0.23        | 1.00        | 0.67        | 0.02         | dbSNP_129          | missense        | missense                   | GYS2            |
| 12        | 27,648,710         | rs3751223          | C        | T        | yes         | 0.25        | 1.00        | 0.68        | 0.05         | dbSNP_107          | missense        | missense                   | C12orf70        |
| 12        | 29,449,986         | .                  | G        | A        | yes         | 0.23        | 1.00        | 0.67        | 0            | none               | missense        | unknown                    | FAR2            |
| <b>21</b> | <b>28,210,457</b>  | <b>rs71317487</b>  | <b>T</b> | <b>C</b> | <b>yes</b>  | <b>0.03</b> | <b>1.00</b> | <b>0.34</b> | <b>0.004</b> | <b>dbSNP_130</b>   | <b>missense</b> | <b>missense</b>            | <b>ADAMTS1</b>  |
| <b>21</b> | <b>40,190,408</b>  | <b>rs61735785</b>  | <b>C</b> | <b>A</b> | <b>yes</b>  | <b>0.03</b> | <b>1.00</b> | <b>0.34</b> | <b>0.01</b>  | <b>dbSNP_129</b>   | <b>missense</b> | <b>missense</b>            | <b>ETS2</b>     |

Table OR3f: AU599 variants with a segregation pattern consistent with Mendelian inheritance or association  $p \leq 0.05$ . Bold indicates variants with  $p \leq 0.05$ . Pattern denotes whether the variant was present in a pattern consistent with Mendelian inheritance, based on WES only. . \* indicates genes known to have a high rate of false positives in exome sequencing as indicated by Fajardo et al 2011 (Detecting false positive signals in exome sequencing, Human Mutation 33(4):609-613).

| chr      | position           | rsname            | ref      | alt      | pattern    | p-value     | Mean dosage |             |             | Predicted function |                   |                 |                 |
|----------|--------------------|-------------------|----------|----------|------------|-------------|-------------|-------------|-------------|--------------------|-------------------|-----------------|-----------------|
|          |                    |                   |          |          |            |             | affected    | unaffected  | 1KGP        | dbSNP              | GVS               | DBSNP           | Gene            |
| 1        | 228,033,258        | rs61741607        | T        | A        | Yes        | 0.08        | 1.01        | 0.41        | 0.03        | dbSNP_129          | missense          | missense        | PRSS38          |
| <b>6</b> | <b>84,904,604</b>  | <b>rs17790493</b> | <b>G</b> | <b>C</b> | <b>No</b>  | <b>0.01</b> | <b>1.51</b> | <b>0.22</b> | <b>0.04</b> | <b>dbSNP_123</b>   | <b>missense</b>   | <b>missense</b> | <b>KIAA1009</b> |
| <b>6</b> | <b>90,024,862</b>  | .                 | <b>A</b> | <b>G</b> | <b>Yes</b> | <b>0.01</b> | <b>1.00</b> | <b>0.20</b> | <b>0</b>    | <b>dbSNP_134</b>   | <b>missense</b>   | <b>missense</b> | <b>GABRR2</b>   |
| <b>7</b> | <b>142,836,646</b> | <b>rs75076193</b> | <b>C</b> | <b>T</b> | <b>Yes</b> | <b>0.00</b> | <b>1.00</b> | <b>0.00</b> | <b>0.01</b> | <b>dbSNP_131</b>   | <b>missense</b>   | <b>missense</b> | <b>PIP</b>      |
| <b>7</b> | <b>149,522,165</b> | .                 | <b>G</b> | <b>A</b> | <b>Yes</b> | <b>0.01</b> | <b>1.00</b> | <b>0.20</b> | <b>0.01</b> | <b>dbSNP_132</b>   | <b>coding</b>     | <b>missense</b> | <b>SSPO*</b>    |
| <b>7</b> | <b>150,389,751</b> | .                 | <b>C</b> | <b>A</b> | <b>Yes</b> | <b>0.01</b> | <b>1.00</b> | <b>0.20</b> | <b>0</b>    | <b>dbSNP_134</b>   | <b>synonymous</b> | <b>missense</b> | <b>GIMAP2</b>   |
| <b>7</b> | <b>151,945,007</b> | <b>rs2479172</b>  | <b>C</b> | <b>T</b> | <b>Yes</b> | <b>0.01</b> | <b>1.00</b> | <b>0.20</b> | <b>0</b>    | <b>dbSNP_134</b>   | <b>synonymous</b> | <b>missense</b> | <b>MLL3*</b>    |
| <b>7</b> | <b>151,949,735</b> | <b>rs77652527</b> | <b>T</b> | <b>C</b> | <b>Yes</b> | <b>0.01</b> | <b>1.01</b> | <b>0.21</b> | <b>0.05</b> | <b>dbSNP_131</b>   | <b>missense</b>   | <b>missense</b> | <b>MLL3*</b>    |
| <b>7</b> | <b>151,970,856</b> | <b>rs10454320</b> | <b>T</b> | <b>A</b> | <b>Yes</b> | <b>0.01</b> | <b>1.00</b> | <b>0.20</b> | <b>0</b>    | <b>dbSNP_119</b>   | <b>synonymous</b> | <b>missense</b> | <b>MLL3*</b>    |
| <b>7</b> | <b>151,970,931</b> | <b>rs56850341</b> | <b>G</b> | <b>A</b> | <b>Yes</b> | <b>0.01</b> | <b>1.00</b> | <b>0.20</b> | <b>0</b>    | <b>dbSNP_129</b>   | <b>synonymous</b> | <b>missense</b> | <b>MLL3*</b>    |
| 14       | 23,451,345         | rs45543740        | G        | A        | Yes        | 0.07        | 1.00        | 0.40        | 0.01        | dbSNP_127          | missense          | missense        | AJUBA           |
| 14       | 24,780,751         | .                 | A        | G        | yes        | 0.07        | 1.00        | 0.40        | 0           | dbSNP_137          | utr-5             | utr-5-prime     | LTB4R,LTB4R2    |

Table OR3g: AU113 variants with a segregation pattern consistent with Mendelian inheritance or association  $p \leq 0.05$ . Bold indicates variants with  $p \leq 0.05$ . Pattern denotes whether the variant was present in a pattern consistent with Mendelian inheritance, based on WES only. \*\* this variant did not have a segregation pattern consistent with Mendelian inheritance due to a missing genotype in one affected individual.

| chr       | position           | rsname             | ref            | alt      | pattern     | p-val       | Mean dosage |             |             | Predicted function |                    |                         |               |
|-----------|--------------------|--------------------|----------------|----------|-------------|-------------|-------------|-------------|-------------|--------------------|--------------------|-------------------------|---------------|
|           |                    |                    |                |          |             |             | affected    | unaffected  | 1KGP        | dbSNP              | GVS                | DBSNP                   | Gene          |
| <b>4</b>  | <b>520,973</b>     | <b>rs201269761</b> | <b>G</b>       | <b>A</b> | <b>yes</b>  | <b>0.00</b> | <b>1.00</b> | <b>0.02</b> | <b>0</b>    | <b>dbSNP_137</b>   | <b>missense</b>    | <b>missense</b>         | <b>PIGG</b>   |
| <b>4</b>  | <b>1,656,767</b>   | <b>rs146433325</b> | <b>G</b>       | <b>A</b> | <b>No**</b> | <b>0.00</b> | <b>1.00</b> | <b>0.01</b> | <b>0</b>    | <b>dbSNP_134</b>   | <b>missense</b>    | <b>missense</b>         | <b>FAM53A</b> |
| <b>4</b>  | <b>4,198,948</b>   | <b>rs112623841</b> | <b>GCGTTGC</b> | <b>G</b> | <b>yes</b>  | <b>0.00</b> | <b>1.00</b> | <b>0.04</b> | <b>0.04</b> | <b>dbSNP_132</b>   | <b>coding</b>      | <b>cds-indel</b>        | <b>OTOP1</b>  |
| 4         | 110,773,048        | rs61745483         | C              | A        | yes         | 0.12        | 1.00        | 0.36        | 0.04        | dbSNP_129          | missense           | missense                | LRIT3         |
| 4         | 119,673,889        | rs141180741        | G              | A        | yes         | 0.13        | 1.00        | 0.46        | 0.01        | dbSNP_134          | missense           | missense                | SEC24D        |
| <b>6</b>  | <b>161,508,880</b> | <b>rs35533223</b>  | <b>A</b>       | <b>C</b> | <b>yes</b>  | <b>0.00</b> | <b>1.00</b> | <b>0.03</b> | <b>0.03</b> | <b>dbSNP_126</b>   | <b>missense</b>    | <b>missense</b>         | <b>MAP3K4</b> |
| <b>17</b> | <b>11,543,588</b>  | <b>rs17600516</b>  | <b>G</b>       | <b>A</b> | <b>yes</b>  | <b>0.01</b> | <b>1.00</b> | <b>0.50</b> | <b>0.03</b> | <b>dbSNP_123</b>   | <b>near-splice</b> | <b>synonymous-codon</b> | <b>DNAH9</b>  |
| 17        | 14,110,294         | rs111541535        | G              | T        | yes         | 0.10        | 1.00        | 0.33        | 0.01        | dbSNP_132          | missense           | missense                | COX10         |
| 17        | 27,893,565         | .                  | CA             | C        | yes         | 0.10        | 1.00        | 0.35        | 0.03        | none               | frameshift         | unknown                 | ABHD15        |

|    |            |             |   |   |     |      |      |      |       |           |             |             |               |
|----|------------|-------------|---|---|-----|------|------|------|-------|-----------|-------------|-------------|---------------|
| 17 | 30,348,206 | rs79573699  | C | T | yes | 0.65 | 1.00 | 0.85 | 0.03  | dbSNP_131 | missense    | missense    | <i>LRRC37</i> |
| 17 | 33,592,323 | rs113644060 | C | G | yes | 0.11 | 1.00 | 0.34 | 0.02  | dbSNP_132 | missense    | missense    | <i>B</i>      |
| 17 | 33,880,305 | rs79007502  | T | C | yes | 0.10 | 1.00 | 0.34 | 0.03  | dbSNP_132 | missense    | missense    | <i>SLFN5</i>  |
| 17 | 36,872,024 | rs146278240 | G | A | yes | 0.11 | 1.00 | 0.34 | 0.01  | dbSNP_134 | missense    | missense    | <i>SLFN14</i> |
| 17 | 36,872,922 | rs145966494 | G | T | yes | 0.11 | 1.00 | 0.34 | 0.01  | dbSNP_134 | missense    | missense    | <i>MLLT6</i>  |
| 17 | 39,135,143 | rs201414134 | T | C | yes | 0.12 | 1.00 | 0.34 | 0.004 | dbSNP_137 | missense    | missense    | <i>MLLT6</i>  |
| 17 | 40,996,783 | rs147588427 | G | A | yes | 0.11 | 1.00 | 0.34 | 0     | dbSNP_134 | stop-gained | stop-gained | <i>KRT40</i>  |
| 17 | 61,615,545 | rs147985248 | A | G | yes | 0.12 | 1.00 | 0.34 | 0.02  | dbSNP_134 | missense    | missense    | <i>AOC2</i>   |
| 17 | 73,900,941 | .           | A | G | yes | 0.37 | 1.00 | 0.67 | 0     | none      | missense    | unknown     | <i>KCNH6</i>  |
| 17 | 79,502,218 | rs186367879 | G | A | yes | 0.37 | 1.00 | 0.68 | 0.05  | dbSNP_135 | missense    | missense    | <i>MRPL38</i> |
| 17 | 79,614,951 | rs79350765  | C | T | yes | 0.37 | 1.00 | 0.68 | 0.05  | dbSNP_131 | missense    | missense    | <i>FSCN2</i>  |
| 22 | 50,216,975 | .           | T | G | yes | 0.11 | 1.00 | 0.34 | 0     | none      | missense    | unknown     | <i>TSPAN1</i> |
| 22 | 50,313,452 | rs149112831 | C | T | yes | 0.11 | 1.00 | 0.34 | 0.01  | dbSNP_134 | missense    | missense    | <i>0</i>      |
| 22 | 50,315,363 | rs8139422   | C | A | yes | 0.10 | 1.00 | 0.34 | 0.03  | dbSNP_116 | missense    | missense    | <i>BRD1</i>   |
| 22 | 50,316,906 | rs145684970 | C | T | yes | 0.11 | 1.00 | 0.34 | 0.01  | dbSNP_134 | missense    | missense    | <i>CRELD2</i> |
